# Supplementary material
Source: Springer Nature journal article supplement (https://www.springermedizin.de/resource/supplementary/12885_2009_2075_MOESM2_ESM.pdf/9460454)

**0****100****200****( $\mu$ M)**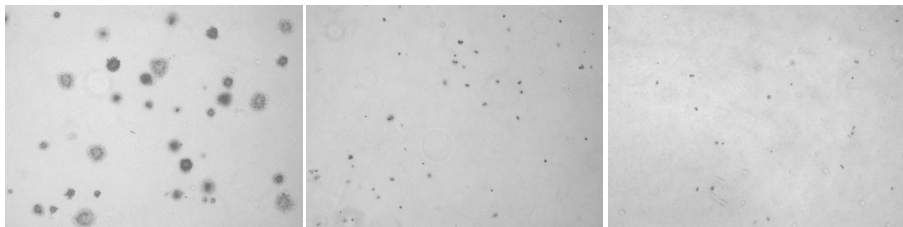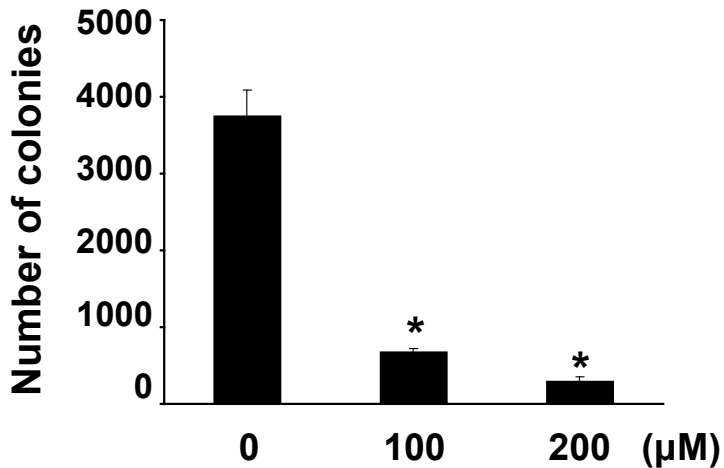

Supplement: MOESM2 [file 9460454]
